# Supplementary material for: A combined experimental and computational study of the substituent effect on the photodynamic efficacy of amphiphilic Zn(ii)phthalocyanines
Source: Royal Society of Chemistry journal article supplement (doi:10.1039/c6tb01341d), 2016-01-01
Supplement: c6tb01341d1.pdf [file c6tb01341d1.pdf]

# **A combined experimental and computational study of the substituent effect on photodynamic efficacy of amphiphilic Zn(II)phthalocyanines**

Anzhela Galstyan,<sup>\*a,b</sup> Kristina Riehemann,<sup>b</sup> Michael Schäfers<sup>a,c,d</sup>  
and Andreas Faust<sup>a,c,d</sup>

<sup>a</sup>European Institute for Molecular Imaging, Waldeyerstr.15, 48149 Münster (Germany),  
[anzhela.galstyan@wwu.de](mailto:anzhela.galstyan@wwu.de)

<sup>b</sup>Physikalisches Institut and CeNTech, Westfälische Wilhelms-Universität Münster, Heisenbergstrasse  
11, 48149 Münster (Germany).

<sup>c</sup> Department of Nuclear Medicine, University Hospital Münster, Albert-Schweitzer-Campus 1, 48149  
Münster

<sup>d</sup> DFG EXC 1003 'Cells in Motion' Cluster of Excellence, University of Münster, Germany

## **Supporting Information**

### **Table of Contents**

|                                                              |     |
|--------------------------------------------------------------|-----|
| 1. Photophysical Data                                        | S2  |
| 1.1 Absorption spectra                                       | S2  |
| 1.2 Excitation and emission spectra                          | S3  |
| 1.3 Time resolved luminescence decays                        | S4  |
| 1.4 Determination of singlet molecular oxygen quantum yields | S7  |
| 2. Partition coefficient                                     | S8  |
| 3. Theoretical studies                                       | S8  |
| 4. <i>In vitro</i> studies                                   | S10 |
| 5. Analytical data                                           | S11 |

## 1. Photophysical Data

### 1.1. Absorption spectra

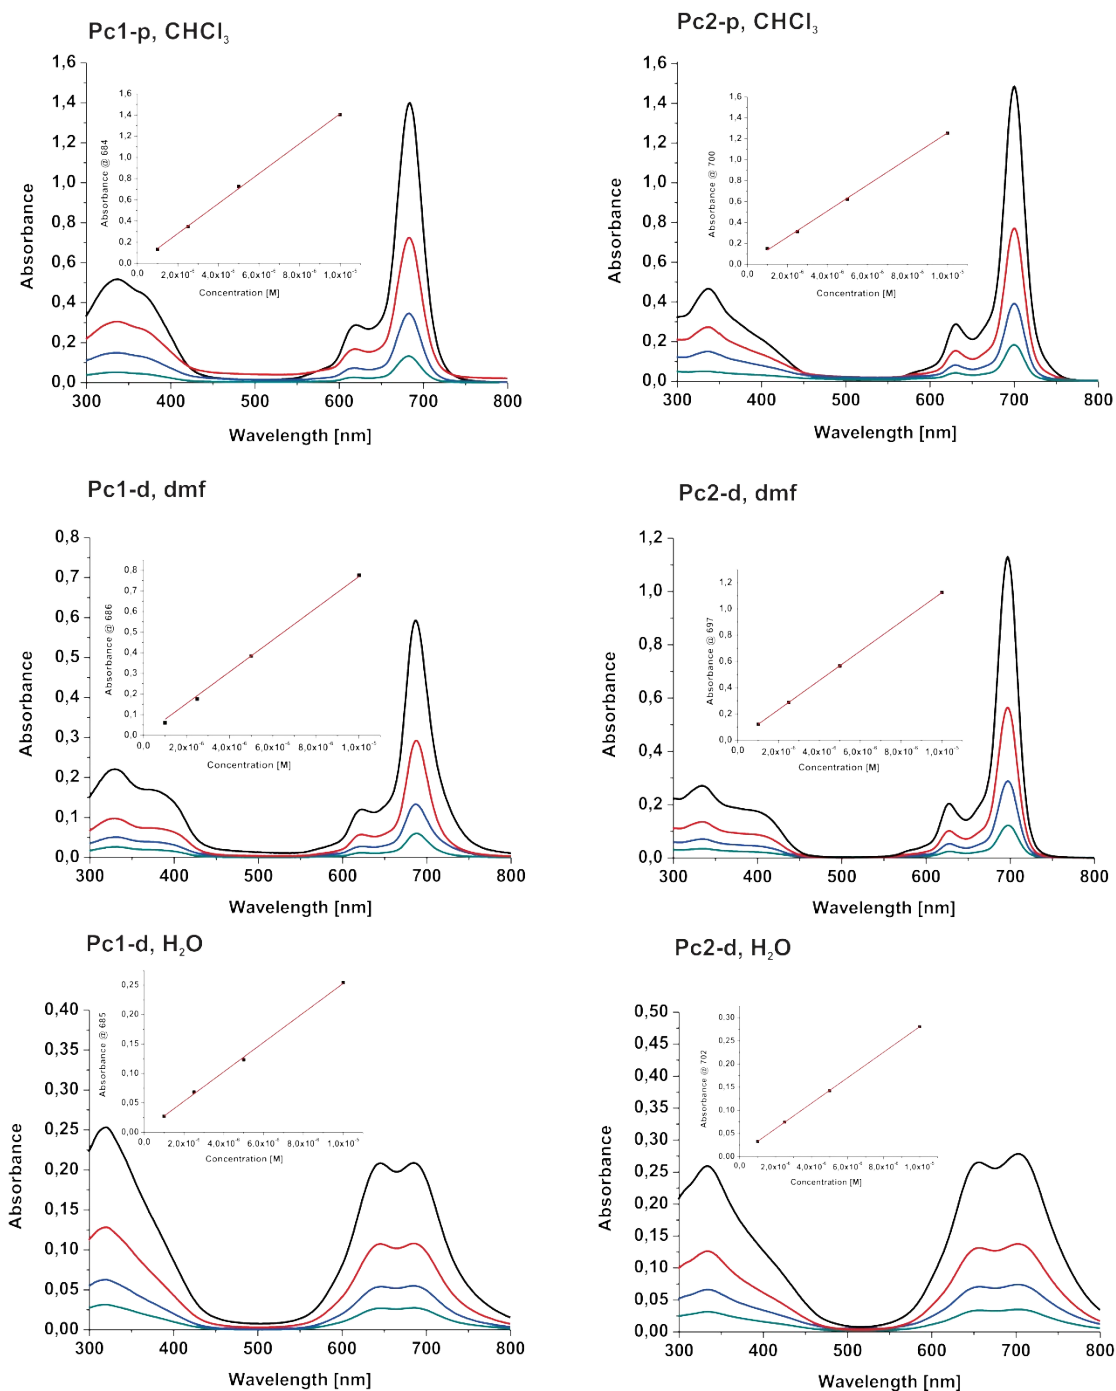

**Figure S1.** UV-Visible spectra of **Pc1-p**, **Pc2-p**, **Pc1-d** and **Pc2-d** in different solvents (CHCl<sub>3</sub>, DMF and H<sub>2</sub>O) at different concentrations (1 to 10  $\mu$ M). The inset of each spectrum plots the Q-band absorbance vs the concentration of the Zn(II)phthalocyanine and the line represents the best-fitted straight line.

## 1.2. Excitation and emission spectra

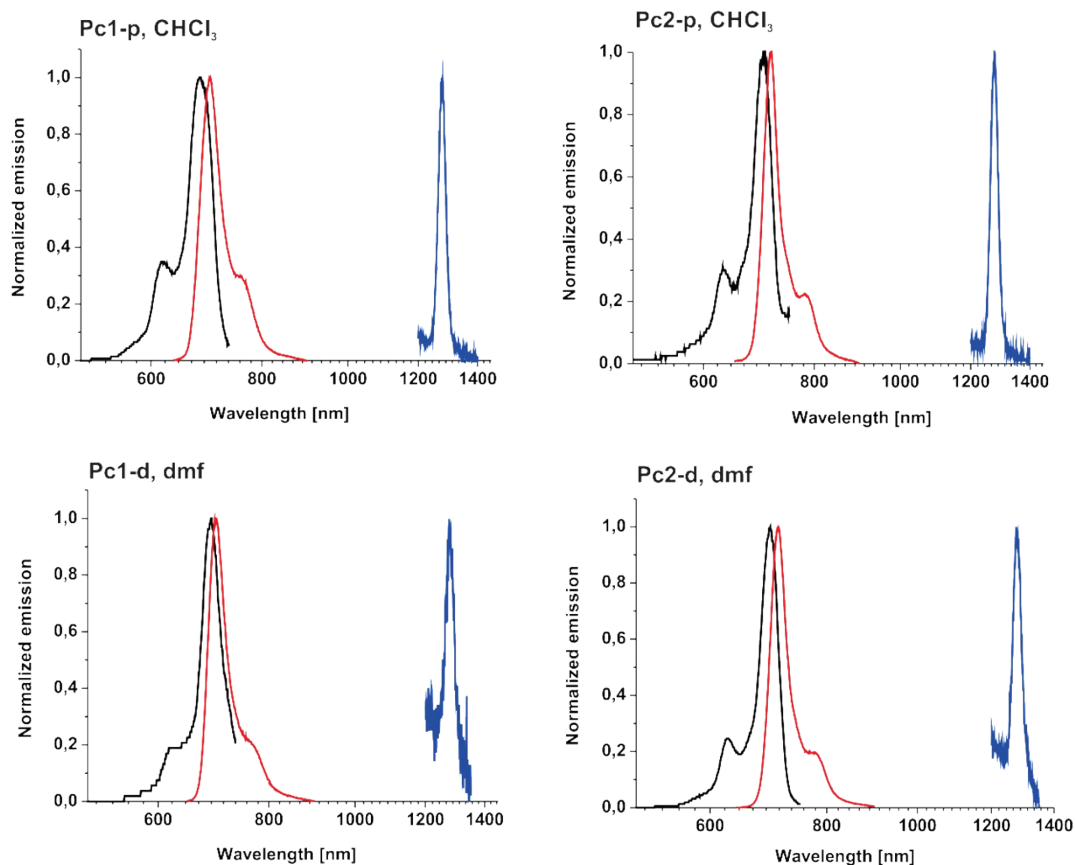

**Figure S2.** Excitation, fluorescence and singlet oxygen emission spectra of **Pc1-p** ( $\lambda_{\text{exc}}=610\text{nm}$ ,  $\lambda_{\text{em}}=760\text{nm}$ ) and **Pc2-p** ( $\lambda_{\text{exc}}=625\text{nm}$ ,  $\lambda_{\text{em}}=784\text{nm}$ ) in  $\text{CHCl}_3$  and **Pc1-d** ( $\lambda_{\text{exc}}=610\text{nm}$ ,  $\lambda_{\text{em}}=760\text{nm}$ ) and **Pc2-d** ( $\lambda_{\text{exc}}=625\text{nm}$ ,  $\lambda_{\text{em}}=785\text{nm}$ ) in DMF.

### 1.3. Time resolved luminescence decays

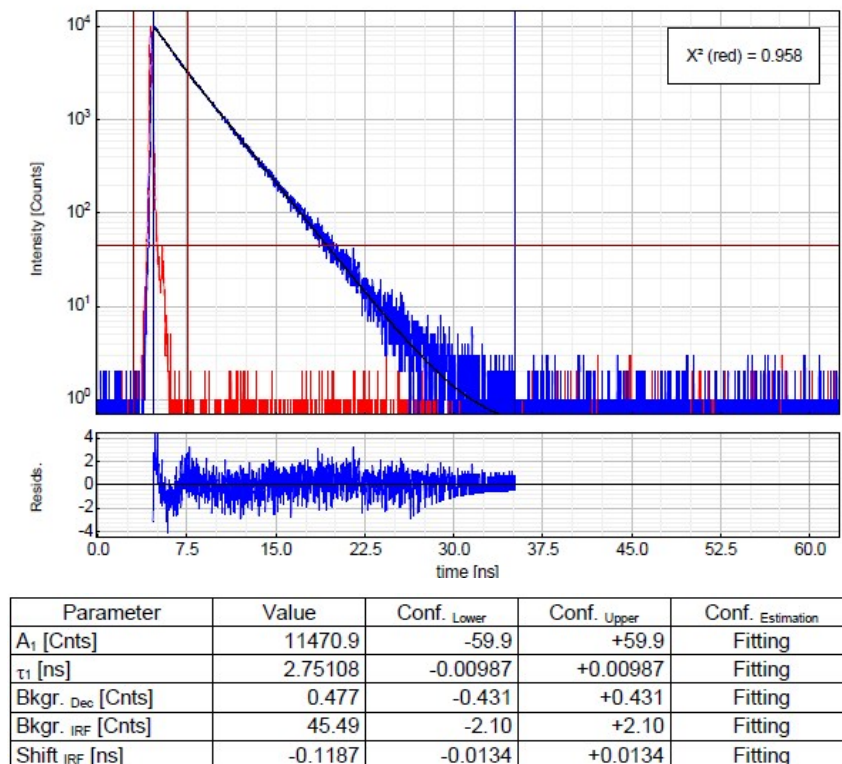

**Figure S3.** Time-resolved luminescence decay of **ZnPc1-p** in CHCl<sub>3</sub> including the instrument response function and the residuals ( $\lambda_{\text{exc}}=635$  nm) and fitting parameters including pre-exponential factors and confidence limits.

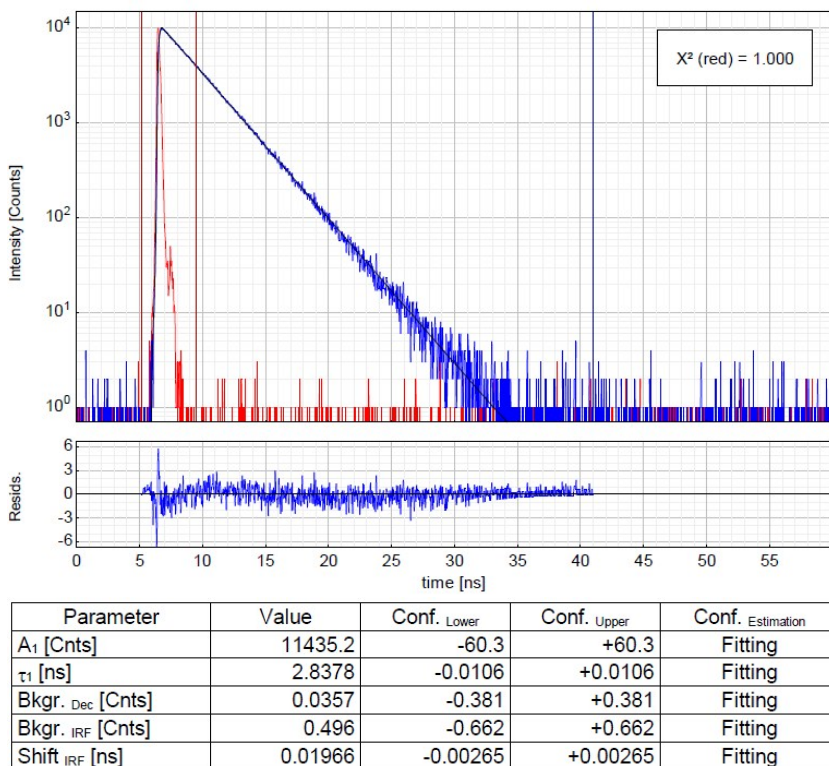

**Figure S4.** Time-resolved luminescence decay of **ZnPc2-p** in CHCl<sub>3</sub> including the instrument response function and the residuals ( $\lambda_{\text{exc}}=635$  nm) and fitting parameters including pre-exponential factors and confidence limits.

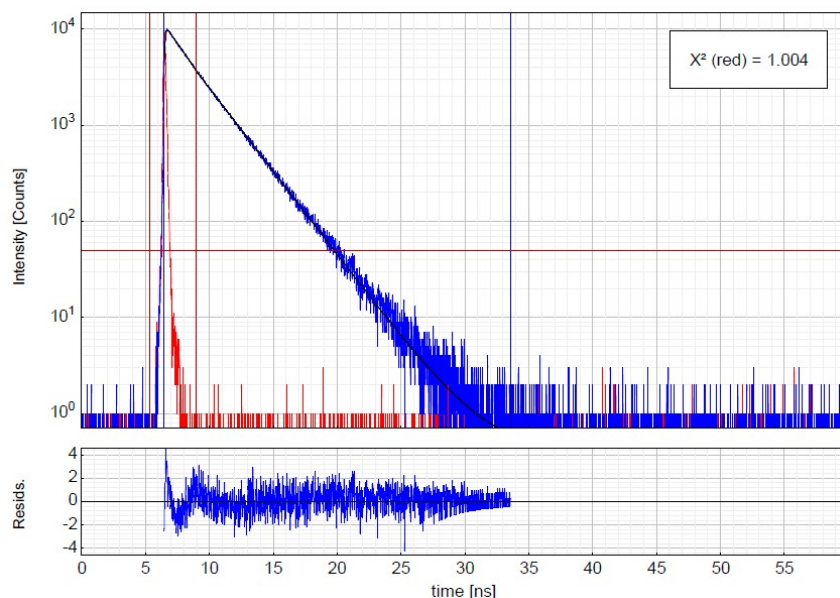

| Parameter             | Value    | Conf. Lower | Conf. Upper | Conf. Estimation |
|-----------------------|----------|-------------|-------------|------------------|
| A <sub>1</sub> [Cnts] | 11342.5  | -58.4       | +58.4       | Fitting          |
| τ <sub>1</sub> [ns]   | 2.50436  | -0.00919    | +0.00919    | Fitting          |
| Bkgr. Dec [Cnts]      | 0.415    | -0.459      | +0.459      | Fitting          |
| Bkgr. IRF [Cnts]      | 49.09    | -2.36       | +2.36       | Fitting          |
| Shift IRF [ns]        | -0.02066 | -0.00300    | +0.00300    | Fitting          |

**Figure S5.** Time-resolved luminescence decay of **ZnPc1-d** in DMF including the instrument response function and the residuals ( $\lambda_{\text{exc}}=635$  nm) and fitting parameters including pre-exponential factors and confidence limits.

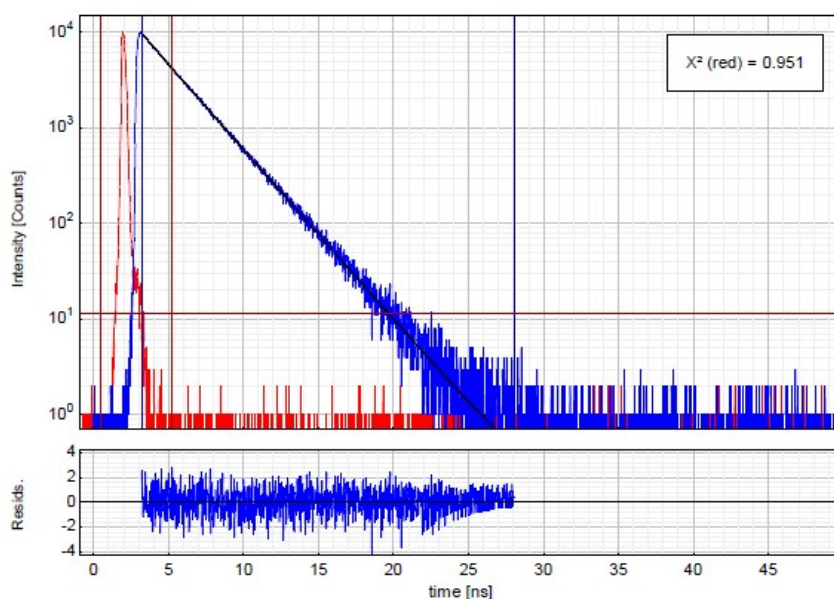

| Parameter             | Value   | Conf. Lower | Conf. Upper | Conf. Estimation |
|-----------------------|---------|-------------|-------------|------------------|
| A <sub>1</sub> [Cnts] | 16067.1 | -80.6       | +80.6       | Fitting          |
| τ <sub>1</sub> [ns]   | 2.44662 | -0.00687    | +0.00687    | Fitting          |
| Bkgr. Dec [Cnts]      | 0.087   | -0.479      | +0.479      | Fitting          |
| Bkgr. IRF [Cnts]      | 11.44   | -2.15       | +2.15       | Fitting          |
| Shift IRF [ns]        | -0.9254 | -0.0120     | +0.0120     | Fitting          |

**Figure S6.** Time-resolved luminescence decay of **ZnPc2-d** in DMF including the instrument response function and the residuals ( $\lambda_{\text{exc}}=635$  nm) and fitting parameters including pre-exponential factors and confidence limits.

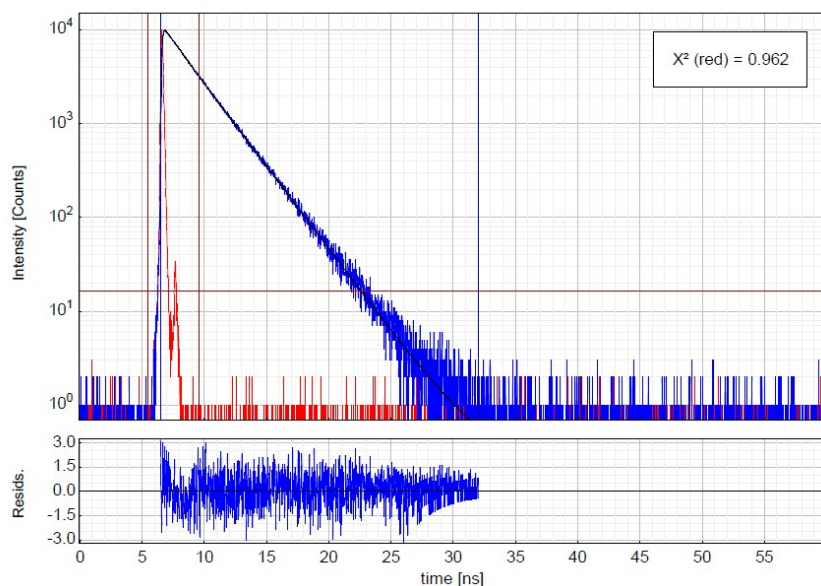

| Parameter                | Value    | Conf. Lower | Conf. Upper | Conf. Estimation |
|--------------------------|----------|-------------|-------------|------------------|
| A <sub>1</sub> [Cnts]    | 11208.7  | -53.9       | +53.9       | Fitting          |
| τ <sub>1</sub> [ns]      | 2.46851  | -0.00846    | +0.00846    | Fitting          |
| Bkgr. Dec [Cnts]         | 0.230    | -0.484      | +0.484      | Fitting          |
| Bkgr. IRF [Cnts]         | 16.31    | -1.95       | +1.95       | Fitting          |
| Shift IRF [ns]           | -0.05793 | -0.00221    | +0.00221    | Fitting          |
| A <sub>Scat</sub> [Cnts] | -4080    | -1520       | +1520       | Fitting          |

**Figure S7.** Time-resolved luminescence decay of **ZnPc1-d** in H<sub>2</sub>O including the instrument response function and the residuals ( $\lambda_{\text{exc}}=635$  nm) and fitting parameters including pre-exponential factors and confidence limits.

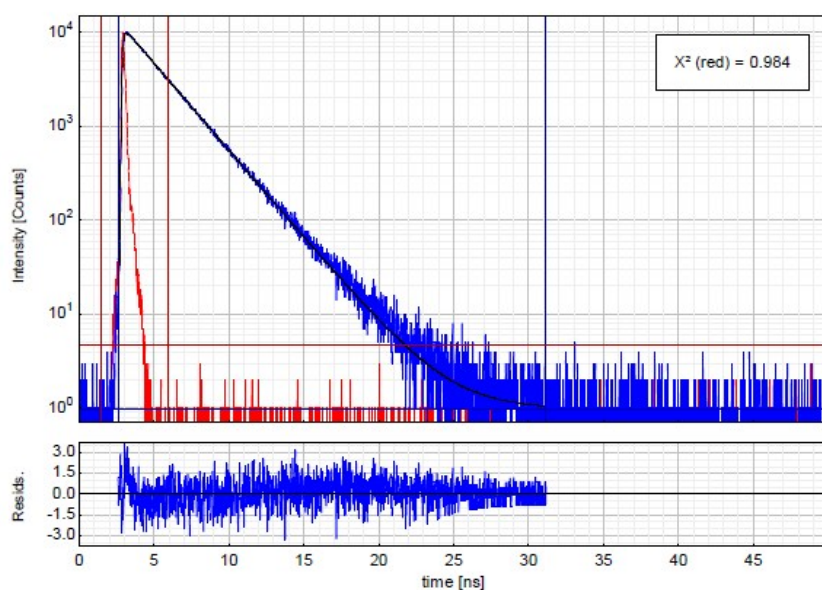

| Parameter                | Value   | Conf. Lower | Conf. Upper | Conf. Estimation |
|--------------------------|---------|-------------|-------------|------------------|
| A <sub>1</sub> [Cnts]    | 11325.3 | -59.1       | +59.1       | Fitting          |
| τ <sub>1</sub> [ns]      | 2.34455 | -0.00873    | +0.00873    | Fitting          |
| Bkgr. Dec [Cnts]         | 0.985   | -0.435      | +0.435      | Fitting          |
| Bkgr. IRF [Cnts]         | 4.73    | -1.64       | +1.64       | Fitting          |
| Shift IRF [ns]           | 0.13918 | -0.00219    | +0.00219    | Fitting          |
| A <sub>Scat</sub> [Cnts] | 25250   | -2210       | +2210       | Fitting          |

**Figure S8.** Time-resolved luminescence decay of **ZnPc2-d** in H<sub>2</sub>O including the instrument response function and the residuals ( $\lambda_{\text{exc}}=635$  nm) and fitting parameters including pre-exponential factors and confidence limits.

#### 1.4. Determination of singlet molecular oxygen quantum yields

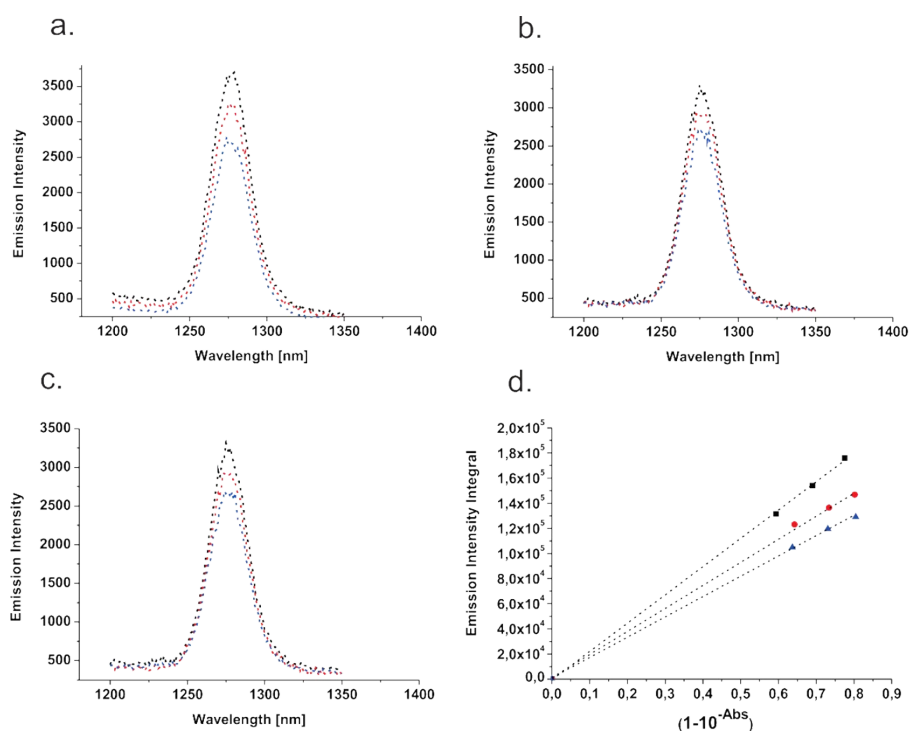

**Figure S9.** Phosphorescence spectrum of the photogenerated singlet oxygen for tetra-*t*-butylphthalocyaninato zinc(II) (a), **Pc1-p** (b) and **Pc2-p** (c) in  $\text{CHCl}_3$  for three concentrations. Plots of the emission intensity against the fraction of absorbed light tetra-*t*-butylphthalocyaninato zinc(II) (black), **Pc1-p** (blue) and **Pc2-p** (red). The line represents the best-fitted straight line.

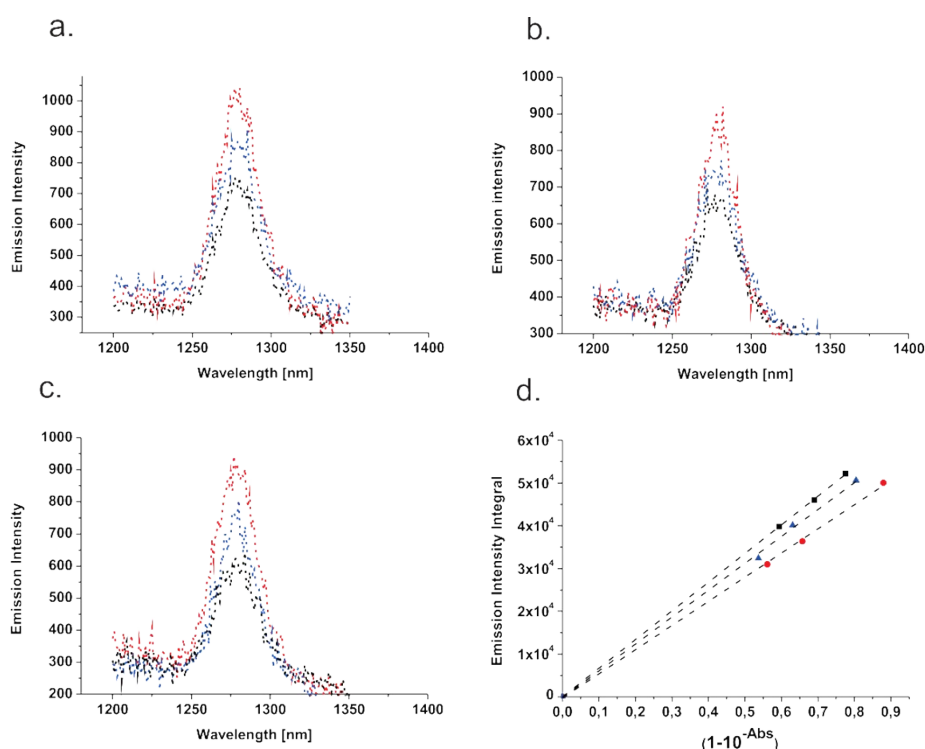

**Figure S10.** Phosphorescence spectrum of the photogenerated singlet oxygen for tetra-*t*-butylphthalocyaninato zinc(II) (a), **Pc1-d** (b) and **Pc2-d** (c) in DMF for three concentrations. Plots of the emission intensity against the fraction of absorbed light tetra-*t*-butylphthalocyaninato zinc(II) (black), **Pc1-d** (red) and **Pc2-d** (blue). The line represents the best-fitted straight line.

## 2. Partition coefficients

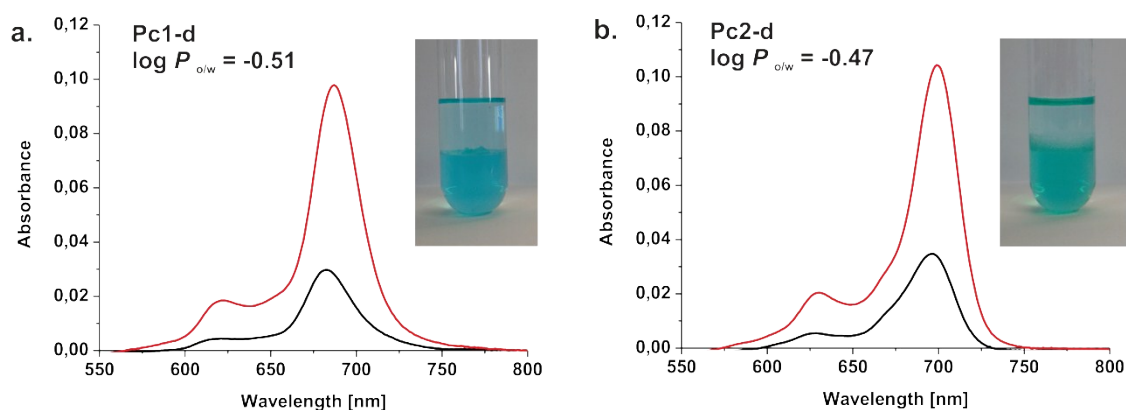

**Figure S11.** Absorption spectra of **Pc1-d** (a) and **Pc2-d** (b) from water phase – red line and 1-octanol phase – black line.

## 3. Binding to Human Serum Albumin

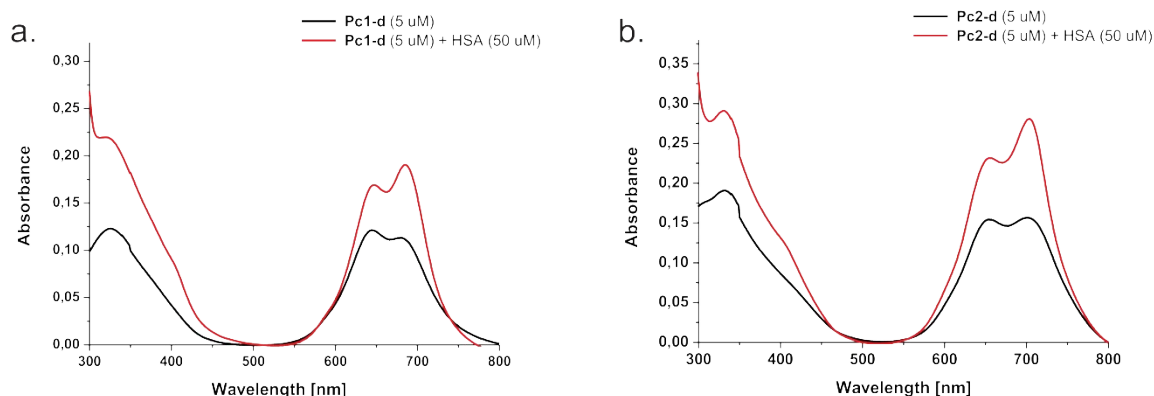

**Figure S12.** Absorption spectra of **Pc1-d** (a) and **Pc2-d** (b) in the absence (black line) and presence of HSA (red line).

## 4. Theoretical calculations

**Table S1.** List of selected molecular orbital energies and HOMO–LUMO energy gaps [eV] for the model system **Pc1-m** and **Pc2-m**.

| Orbital  | Pc1-m   | Pc2-m   |
|----------|---------|---------|
| LUMO + 5 | -0.7878 | -1.0928 |
| LUMO + 4 | -0.8014 | -1.2267 |
| LUMO + 3 | -0.8931 | -1.2278 |
| LUMO + 2 | -1.1886 | -1.2498 |
| LUMO + 1 | -2.8107 | -2.7239 |

|                  |         |         |
|------------------|---------|---------|
| LUMO             | -2.8216 | -2.7451 |
| HOMO             | -4.9498 | -4.7971 |
| HOMO – 1         | -6.3645 | -5.8145 |
| HOMO – 2         | -6.4959 | -5.8456 |
| HOMO – 3         | -6.5095 | -6.1650 |
| HOMO – 4         | -6.5490 | -6.4252 |
| HOMO – 5         | -6.8113 | -6.7204 |
| <hr/>            |         |         |
| HOMO-LUMO<br>gap | 2.1282  | 2.0520  |
| <hr/>            |         |         |

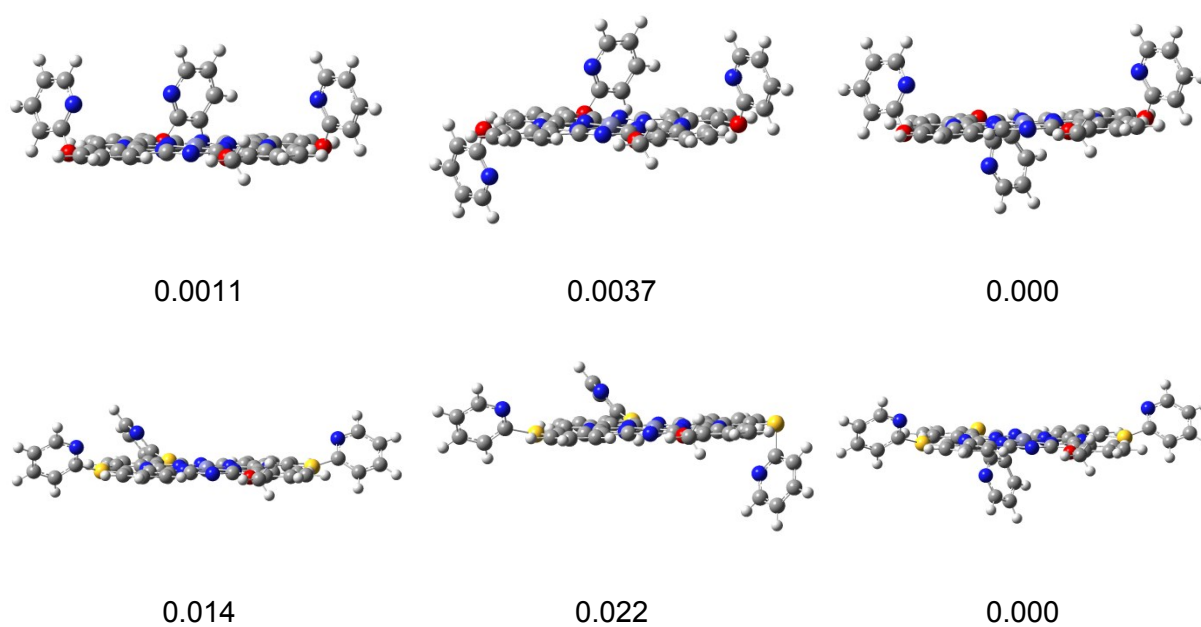

**Figure S13.** Optimized structures of different conformers of the model system **Pc1-m** and **Pc2-m** and the calculated relative energies (kcal mol<sup>-1</sup>) using B3LYP/6-311G(d,p).

## 5. *In vitro* studies

**Table S2.** Summary of the irradiation experiments.

| Compound     |            | Pos. Control | H <sub>2</sub> O Control | Neg. Control   | 10µg/ml       | 5µg/ml         | 1µg/ml          |
|--------------|------------|--------------|--------------------------|----------------|---------------|----------------|-----------------|
| <b>Pc1-d</b> | irradiated | 0.00 (±0.16) | 99.31 (±2.88 )           | 100.00 (±1.86) | 17.28 (±3.60) | 57.92 (±12.74) | 93.97 (±4.06)   |
|              | dark       | 0.00 (±0.04) | 106.15 (±9.11)           | 100.00 (±7.65) | 97.92 (±8.63) | 104.87 (±9.38) | 108.98 (±14.78) |
| <b>Pc2-d</b> | irradiated | 0.00 (±0.24) | 104.56(±6.28)            | 100.00(±8.92)  | 2.43 (±1.95)  | 16.38 (±5.21)  | 77.98 (±7.39)   |
|              | dark       | 0.00 (±0.15) | 111.61(±15.73)           | 100.00(±9.16)  | 88.86 (±7.89) | 95.80(±11.20)  | 100.68(±3.90)   |

**Pc1-d** 0mg/ml 24h after irradiation

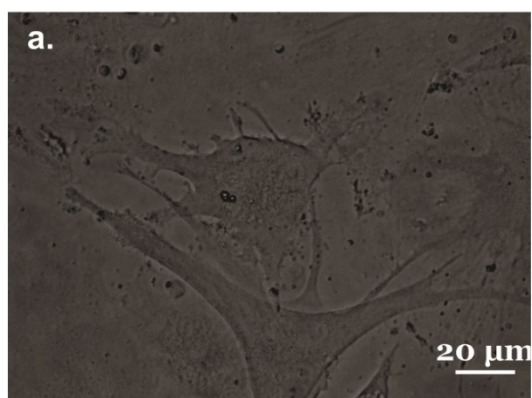

**Pc1-d** 10mg/ml 24h after irradiation

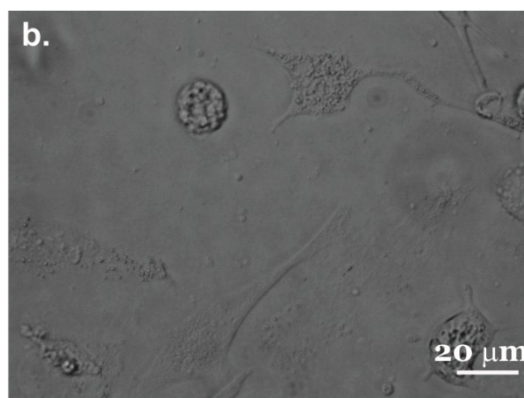

**Pc2-d** 0mg/ml 24h after irradiation

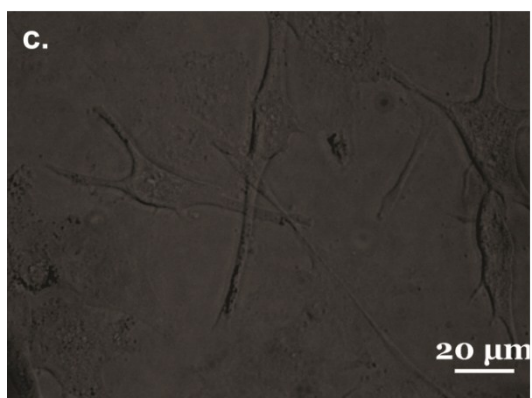

**Pc2-d** 10mg/ml 24h after irradiation

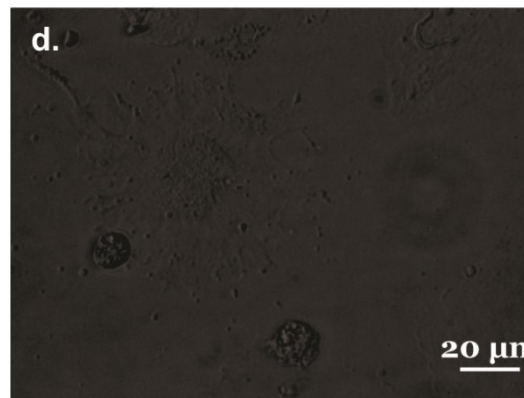

**Figure S14.** Morphological changes after PDT for COLO-818 cell line incubated with 10 mg/ml **Pc1-d** (b) and **Pc2-d** (d) 24h after irradiation. Negative controls for **Pc1-d** (a) and **Pc2-d** (c).

## 6. Analytical Data

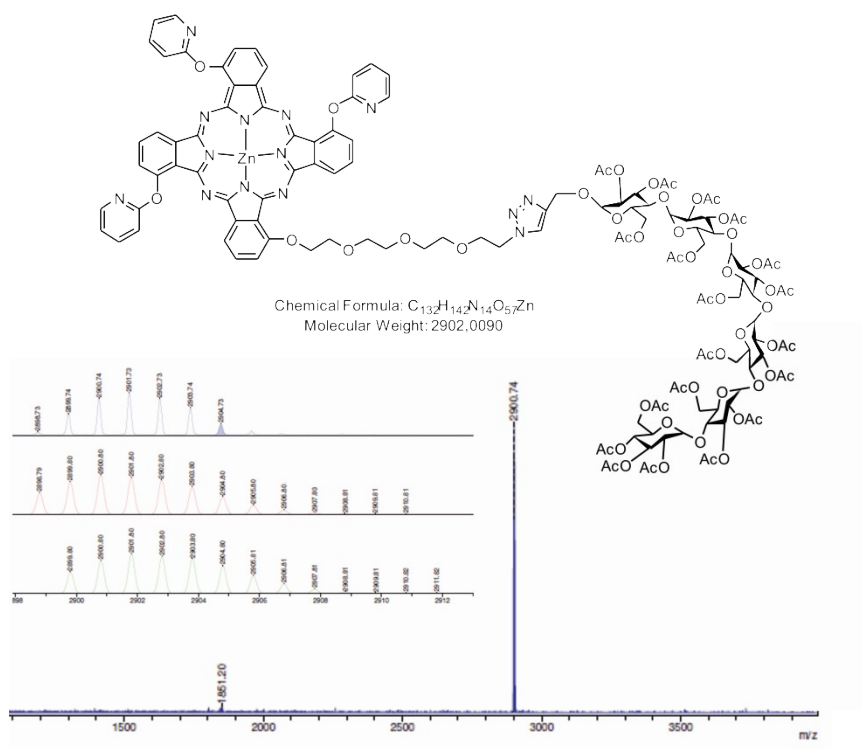

**Figure S15.** MALDI-MS spectra of **Pc1-p** measured in trans-2-[3-(4-tert-Butylphenyl)-2-methyl-2-propenylidene]malononitrile DCTB matrix ( $CHCl_3$ ). Insert: measured and calculated isotope pattern.

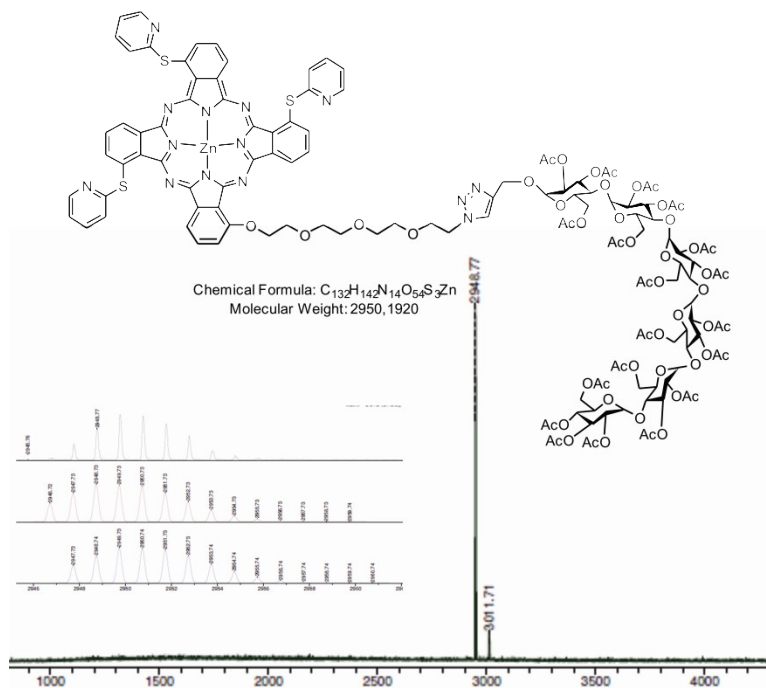

**Figure S16.** MALDI-MS spectra of **Pc2-p** measured in trans-2-[3-(4-tert-Butylphenyl)-2-methyl-2-propenylidene]malononitrile DCTB matrix ( $CHCl_3$ ). Insert: measured and calculated isotope pattern.

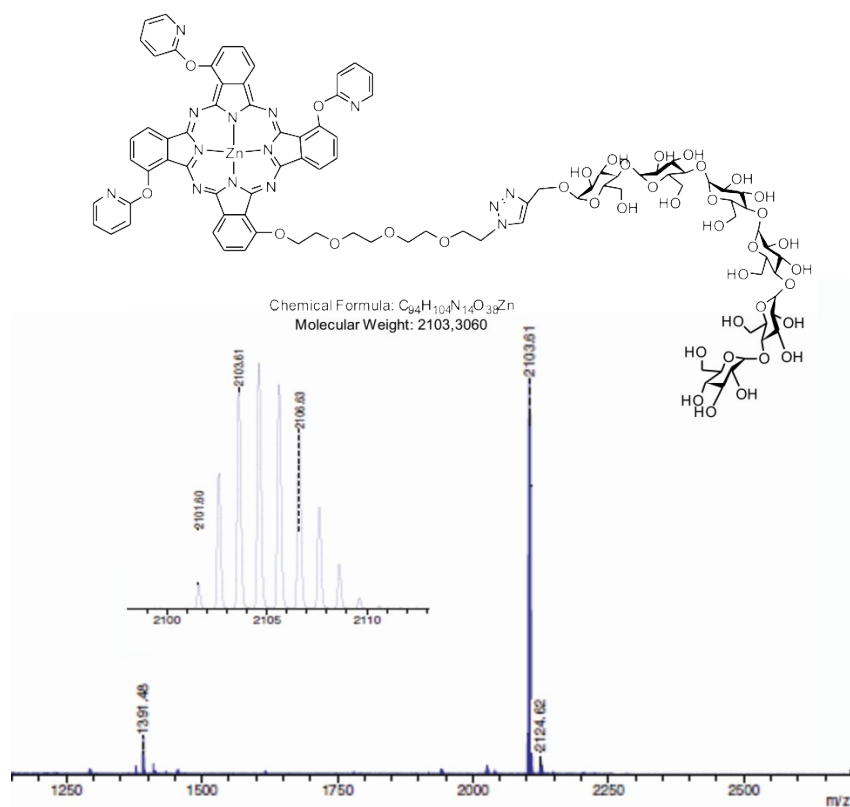

**Figure S17.** MALDI-MS spectra of **Pc1-d** measured in 2,5-Dihydroxybenzoic acid DHB matrix ( $H_2O/ACN$ ). Insert: measured isotope pattern.

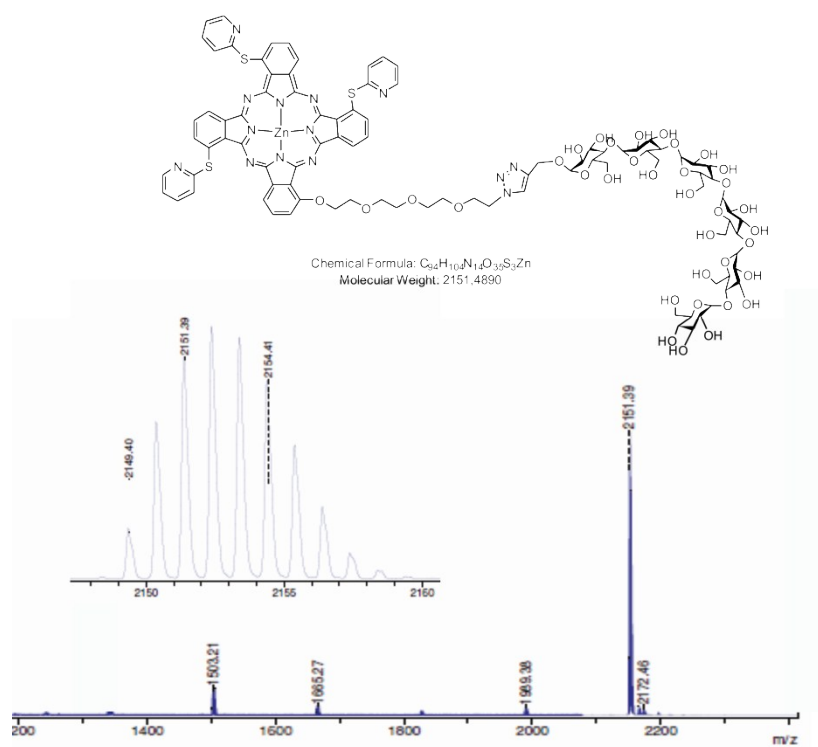

**Figure S18.** MALDI-MS spectra of **Pc2-d** measured in 2,5-Dihydroxybenzoic acid DHB matrix ( $H_2O/ACN$ ). Insert: measured isotope pattern.

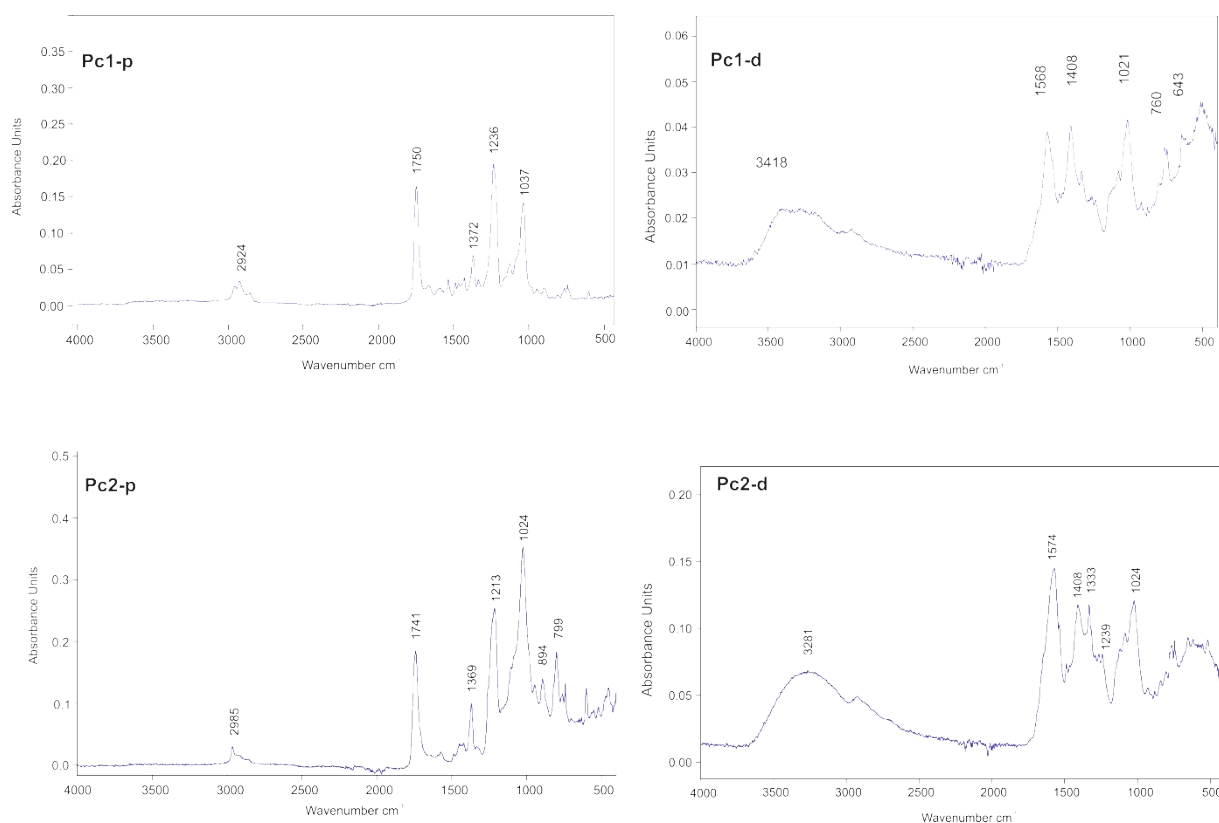

**Figure S19.** FT-IR spectra of **Pc1-p**, **Pc1-d**, **Pc2-p** and **Pc2-d**.

***$^1\text{H}$  NMR spectra show broad chemical shifts likely due to the self-aggregation at NMR concentration as well as presence of four positional isomers.***
